1 **CoBRA: Containerized Bioinformatics workflow for**  
2 **Reproducible ChIP/ATAC-seq Analysis - from differential peak**  
3 **calling to pathway analysis**

4 Xintao Qiu<sup>1,2,#</sup>, Avery S. Feit<sup>2,3,#</sup>, Ariel Feiglin<sup>4,#</sup>, Yingtian Xie<sup>1</sup>, Nikolas Kesten<sup>1</sup>, Len  
5 Taing<sup>1,5</sup>, Joseph Perkins<sup>1</sup>, Ningxuan Zhou<sup>1</sup>, Shengqing Gu<sup>5</sup>, Yihao Li<sup>2</sup>, Paloma Cejas<sup>1,2</sup>,  
6 Rinath Jeselsohn<sup>2</sup>, Myles Brown<sup>1,2</sup>, X. Shirley Liu<sup>1,5</sup>, Henry W. Long<sup>1,2\*</sup>

7  
8 1 Center for Functional Cancer Epigenetics, Dana-Farber Cancer Institute, Boston, MA, 02215, USA

9 2 Department of Medical Oncology, Dana-Farber Cancer Institute, Harvard Medical School, Boston, MA,  
10 02215, USA

11 3 Albert Einstein College of Medicine, The Bronx, NY, 10461 USA

12 4 Department of Biomedical Informatics, Harvard Medical School, Boston, MA 02215, USA.

13 5 Department of Data Sciences, Dana Farber Cancer Institute, Harvard T.H. Chan School of Public Health,  
14 Boston, MA 02215, USA.

15 \*Correspondence: Henry\_Long@dfci.harvard.edu

16 #Equal contributors

17

18

19 **KEYWORDS:** ChIP-seq, ATAC-seq, Snakemake, Docker, workflow

20

21

22 **Word Counts:**

23 **ABSTRACT:** 118

24 **ARTICLE:** 3593

25

26 **REFERENCES:** 27

27 **FIGURES:** 4

28 **TABLES:** 1

29 **SUPPLEMENTARY FIGURES:** 3

30 **SUPPLEMENTARY TABLES:** 0

31

32

33

34

35 **Running Title:** “CoBRA: Containerized analysis for ChIP/ATAC-seq”

36

## 37 **Abstract**

38 ChIP-seq and ATAC-seq have become essential technologies used as effective methods of  
39 measuring protein-DNA interactions and chromatin accessibility. However, there is a need  
40 for a scalable and reproducible pipeline that incorporates correct normalization between  
41 samples, adjustment of copy number variations, and integration of new downstream analysis  
42 tools. Here we present CoBRA, a modularized computational workflow which quantifies  
43 ChIP and ATAC-seq peak regions and performs unsupervised and supervised analysis.  
44 CoBRA provides a comprehensive state-of-the-art ChIP and ATAC-seq analysis pipeline that  
45 is usable by scientists with limited computational experience. This enables researchers to gain  
46 rapid insight into protein-DNA interactions and chromatin accessibility through sample  
47 clustering, differential peak calling, motif enrichment, comparison of sites to a reference DB  
48 and pathway analysis.

49  
50 Code availability: <https://bitbucket.org/cfce/cobra>

## 51 **Introduction**

52 ChIP-seq and ATAC-seq have become essential components of epigenetic analysis. They are  
53 employed extensively in the study of protein-DNA interactions and chromatin accessibility  
54 respectively. Chromatin immunoprecipitation sequencing (ChIP-seq) is a high-throughput  
55 technology that provides unique insights into protein function by mapping genome wide  
56 binding sites of DNA-associated proteins. Further, Assay for Transposase-Accessible  
57 Chromatin sequencing (ATAC-seq) is a high-throughput technology that is imperative in the  
58 assessment of genome-wide chromatin accessibility. While numerous pipelines for analyzing  
59 ChIP-seq and ATAC-seq data have been reported in the literature [1–8] there remains a  
60 strong need for pipelines that can be run by users who have less experience utilizing  
61 computational biology tools. Comparisons between ChIP and ATAC-seq experiments can  
62 provide insight into differences in protein occupancy, histone marks and chromatin  
63 accessibility (Figure 1a), however, existing analysis pipelines can lack useful components  
64 necessary in the analysis. There is a need for better normalization between samples,  
65 adjustment of copy number variations, integrating new downstream analysis tools such as  
66 cistromeDB Toolkit [9] and integrating epigenetic data with RNA-seq.

67  
68 In this work we developed CoBRA (Containerized Bioinformatics workflow for  
69 Reproducible ChIP/ATAC-seq Analysis), a modularized computational workflow which  
70 quantifies ChIP and ATAC-seq peak regions and performs unsupervised and supervised  
71 analysis. The pipeline provides sample clustering, differential peak calling, motif enrichment  
72 and clustering, comparison of sites to a reference DB and pathway analysis. In addition, it  
73 provides clear, high-quality visualizations for all results.

74  
75 CoBRA uses Snakemake [10], a workflow management system to create the computational  
76 pipeline. Using Snakemake system enables the reproducibility and scalability of CoBRA.  
77 This framework allows for the addition or replacement of analysis tools as well as for the  
78 parallelization of computationally intensive processes. To make CoBRA portable, the  
79 workflow and its software dependencies are available as a Docker container, which can be  
80 used on any machine with Docker installed. This includes local servers, high-performance  
81 clusters, and cloud-based machines. Docker will automatically download all required  
82 software dependencies because the container encapsulates all of the supporting software and  
83 libraries, eliminating the possibility of conflicting dependencies.

84

85 CoBRA therefore provides solutions to challenges inherent in many bioinformatics  
86 workflows: it is portable, reproducible, scalable and easy to use. It is open source  
87 (<https://bitbucket.org/cfce/cobra>) and well documented online including step-by-step tutorials  
88 that go through all three case studies presented in this paper ([https://cfce-](https://cfce-cobra.readthedocs.io)  
89 [cobra.readthedocs.io](https://cfce-cobra.readthedocs.io)). This combination of features enables researchers to gain rapid insight  
90 into protein-DNA interactions and chromatin accessibility with comprehensive state-of-the-  
91 art ChIP and ATAC-seq analysis.

## 92 **Methods**

### 93 Overall design

94 The CoBRA pipeline is implemented using the snakemake workflow management system  
95 [10] and is described via a human-readable, Python-based language. This allows CoBRA to  
96 scale to server, cluster, grid and cloud environments, without the need to modify the  
97 workflow. For ChIP-seq and ATAC-seq experiments, CoBRA provides both unsupervised  
98 and supervised analyses (Figure 1b). It does not include preprocessing ChIP and ATAC-seq  
99 quality control steps as this is best handled within other, specialized pipelines [11].

100  
101 Further, CoBRA is distributed as a Docker container, which can be used on any machine as  
102 long as Docker is installed. Docker containers provide a tool for packaging bioinformatics  
103 software. It encapsulates all of the supporting software and libraries, eliminates the possibility  
104 of conflicting dependencies, and facilitates the installation of required software. With the  
105 built-in snakemake reference rule, CoBRA automatically downloads all needed reference  
106 files if they have not been downloaded. As a result, CoBRA is reproducible, portable and  
107 easy to deploy. Users specify analysis parameters in a simple human readable configuration  
108 file (Supplementary Fig1b). A separate file contains metadata about the samples being  
109 analyzed (cell line, treatment, time point, etc.) as well as a specification of the differential  
110 comparisons to be performed by the pipeline. This metadata file is in CSV format and can be  
111 easily modified in any standard text editor or Excel.

### 112 Unsupervised analysis

113 The pipeline calculates the Reads per Kilobase per Million Mapped Reads (RPKM) using bed  
114 files and bam files provided by the user to normalize for sequencing depth and peak size. The  
115 RPKM table is filtered through the removal of sites that have low RPKM across multiple  
116 samples. Quantile Normalization (default), Z-score, Log transform are available options to  
117 normalize the count matrix. To visualize the similarities between samples in the experiment,  
118 sample-sample correlation, principal component analysis (PCA) and sample-feature plot are  
119 automatically generated by the pipeline.

120  
121 The sample-sample correlation plot illustrates the similarity between all of the samples on a  
122 pairwise basis. It also provides the clustering result based on the Pearson correlation  
123 coefficient,  $r$ , where distance =  $1 - r$ . The user can opt for using spearman correlation as well  
124 as selecting other distance methods (euclidean, manhattan, canberra, binary, maximum, or  
125 minkowski) by simply changing the configuration file. The resulting correlation plot helps to  
126 determine whether the different sample types can be separated, i.e., samples of different  
127 conditions are expected to be more dissimilar to each other than replicates within the same  
128 condition. User provided metadata are used to automatically annotate samples in all  
129 unsupervised plots.

130

131 Further, CoBRA will produce a principal component analysis (PCA) plot depicting how  
132 samples are separated in the first two principal components (those with the largest variance)  
133 and samples will be automatically color-coded by all user provided annotations. The PCA  
134 plot helps the user to determine if any patterns exist between the samples and if outliers are  
135 present. Finally, CoBRA will generate a Sample-Feature heatmap. The heatmap illustrates the  
136 clustering of samples based on correlation on the horizontal axis and clustering of peaks on  
137 the vertical axis. Peaks on the vertical axis can be clustered by hierarchical or k-means  
138 clustering. The sample-feature heatmap elucidates patterns of peaks across samples and  
139 identifies the clusters that are enriched in a subset of samples.

## 140 Supervised analysis

141 A common question being asked is what the differential sites are (TF binding/ histone  
142 modification/ chromatin accessibility) between sample groups. Several tools (DESeq2,  
143 edgeR, Limma) currently available can be applied to analyze differential sites, most of which  
144 are derived from RNA-seq count analysis. However, there are differences between the RNA-  
145 seq and ChIP-seq count analysis. In RNA-seq experiments, most reads are in the exome,  
146 where reads can be normalized by the total number of reads mapped to all genes. In contrast,  
147 most ChIP-seq reads are outside of peaks. The FRiP score (fraction of reads in peaks)  
148 typically ranges from 1 to 40 percent [11]. Reads in peaks are only a portion of total reads  
149 that have been sequenced. Therefore, all reads need to be normalized by the total number of  
150 uniquely mapped reads to account for sequence depth. CoBRA uses the bam file to calculate  
151 sequencing depth. It utilizes sequencing depth as a scale factor in differential peak calling by  
152 DESeq2 (although the user can specify reads in peaks for scaling if specifically required).  
153 This is an essential step in differential peak calling. The default scale factor utilized by  
154 DESeq2 to normalize the data is the total number of reads mapped to peaks. This method can  
155 result in the calling of false positive differential peaks. Using sequencing depth as the scale  
156 factor ensures that reads are normalized for experimental variation and not biological  
157 variation between samples.

158  
159 Multiple comparisons can be done within a single run. For each comparison, the number of  
160 differential peaks for two adjusted p-value cutoffs and two fold-change cut-offs will be  
161 displayed in a summary chart. Further, the bigwig files are used to plot the peak intensity of  
162 the differential peaks in a heatmap using deepTools2 [12].

163  
164 The differentially enriched regions from DESeq2 for each comparison are subsequently run  
165 through HOMER [13] for motif enrichment analysis. Motif enrichment analysis is a  
166 fundamental approach to look for transcription factor motifs that might be enriched in peaks  
167 of interest. We use Homer in the pipeline to look for known and de novo motifs that are  
168 enriched in the differential peak regions compared to GC matched, randomly selected  
169 genome background. In addition, we utilize a motif clustering algorithm to organize various  
170 motifs by similarity making the output (Supplementary Figure 3) easier to evaluate for  
171 distinct results. By mapping the peaks to the nearest gene, CoBRA uses GSEA pre-ranked  
172 analysis to investigate the pathways that are enriched and depleted for both up and down  
173 peaks.

174  
175 The up and down-regulated sites are also automatically compared to a comprehensive  
176 database of ChIP/ATAC and DNase data [9; 14]. This Cistrome Toolkit analysis determines  
177 the most similar samples in terms of genomic interval overlaps with the differential sites. The  
178 toolkit is particularly useful to identify the major transcription factors related to the  
179 differential perturbations. In addition, it can be useful in the identification of the potential  
180 biological source (cell line, cell type and tissue type) of the regions of interest.

## 181 Results

182 In order to illustrate the utility of CoBRA, we applied it to three projects with components  
183 that illustrate the different capabilities of our workflow: a GR ChIP-seq data set from the  
184 ENCODE project, H3K27ac ChIP-seq data from colon cancer cell lines, and an ATAC-seq  
185 experiment on HL-60 promyelocytes differentiating into macrophages. Each example  
186 demonstrates some key functions of the CoBRA pipeline.

### 187 Case Studies

#### 188 Example 1: Normalizing GR ChIP-seq data in a dose-response experiment

189 We downloaded publicly available glucocorticoid receptor (GR) ChIP-seq data ([GSE32465](#))  
190 from a lung adenocarcinoma cell line (A549) at 3 different concentrations of dexamethasone,  
191 a potent GR agonist. In an analysis of this dataset [15], it was found that the number of  
192 Glucocorticoid Receptor (GR) binding sites increases with increasing dexamethasone  
193 concentration. In the experiment, samples were treated with 0.5nM, 5nM, or 50nM of  
194 dexamethasone. CoBRA's unsupervised analysis showed that the sample replicates cluster  
195 tightly together. Similarities and differences between samples are illustrated by the  
196 correlation between treatments vs within treatment in the dendrogram at the top of sample-  
197 sample heatmap (Figure 2a), as well as the principal component plot (Supplementary Figure  
198 1).

199  
200 While unsupervised analyses are useful, the advantage of the CoBRA pipeline is its ability to  
201 accurately call differential peaks accounting for a variety of factors. We applied DESeq2 to  
202 assess the differences in peak binding for samples treated with 50nM of dexamethasone  
203 versus samples treated with 0.5nM of dexamethasone. Utilizing DESeq2's default scale  
204 factor method which normalizes the data using the total number of reads in peaks, differential  
205 peaks are called (Figure 2b) where they are clearly not present (Figure 2c left). A group of  
206 peaks at the bottom of the figure 2c exhibit similar binding intensity, however, they are  
207 considered downregulated in 50nM treatment in the DESeq2 result.

208  
209 DESeq2 by default normalizes all samples by total reads in the read count table. In RNA-seq,  
210 most reads are in the exome, where reads can be normalized by the total number of reads  
211 mapped to all genes. In contrast, in the GR ChIP-seq experiment, samples treated with 50nM  
212 dexamethasone exhibit much greater GR binding and the FRiP score is higher than samples  
213 treated with 0.5nM (9.3 vs 0.9). Therefore, DESeq2's normalization method decreases the  
214 peak intensity in the 0.5nM treated samples because the FRiP scores are higher in the 50nM  
215 sample resulting in false positive differential peaks (Figure 2c right). In CoBRA, we use a  
216 scaling factor dependent on the sequencing depth of each sample. This eliminates the false  
217 positive downregulated peaks called by DESeq2 using the default scaling factor (Figure 2c  
218 right and Figure 2b). Furthermore, more real differential gained peaks have been successfully  
219 identified with CoBRA's scaling method.

220  
221 An additional feature of CoBRA is that it automatically analyzes the differential peaks to  
222 provide additional insight into their origin and identify similar systems in the literature. In  
223 one analysis it determines the most similar ChIP-seq data that is available in a large, curated  
224 database of ChIP and ATAC data - cistrome.org [14]. For the gained GR binding sites in the  
225 dexamethasone treatment, the result from the Cistrome Toolkit [9] clearly shows that the  
226 *NR3C1* in lung tissue is the most similar ChIP-seq in the cistrome database (Figure 2d).  
227 CoBRA provides a list of GEO accession numbers corresponding to all ChIP-seq data with  
228 similarity to the differential peak set. Using these identifiers, ChIP seq data of interest can be

229 downloaded for further investigation from Cistrome DB[14]. While obviously correct in this  
230 simple case, this tool can provide unique insight into gained or lost sites such as identifying  
231 which transcription factor potentially binds to a differential peak set after a perturbation and  
232 in investigating similar cellular systems. In addition, CoBRA performs a de novo motif  
233 analysis on differential sites which can help to identify potential transcriptional regulators  
234 enriched in our differentially accessible chromatin elements. In this example the top cluster  
235 has all hormone receptor motifs enriched in the upregulated peaks.

#### 236 Example 2: Correcting for Copy Number variation in H3K27ac ChIP-seq

237 We further illustrate the advantages of the CoBRA pipeline utilizing data from colorectal  
238 cancer cell lines. Microsatellite Instable (MSI) and Microsatellite Stable (MSS) are two  
239 classes used to characterize colorectal cancers. To analyze these cell lines, we selected six  
240 publicly available datasets from several experiments: three MSI samples and three MSS  
241 samples [16-20] ([GSM1866974](#), [GSM2265670](#), [GSM1224664](#), [GSM1890746](#),  
242 [GSM2058027](#), [GSM1890746](#)).

243  
244 MSS tumors are one of the most highly mutated tumor types [21] and typically exhibit a high  
245 number of copy number alterations. Without adjustment, a differential peak caller will rank  
246 peak loci with high copy number gain in MSS as being the most differential compared to  
247 MSI. These genetic differences, while important, can obscure important epigenetic  
248 differences between MSI and MSS. In order to observe differential peaks other than those  
249 called as a result of the presence of CNV, copy number variation adjustment was conducted  
250 on all samples. For this example the copy number was called using the ChIP-seq data itself  
251 with CopywriteR [22] but can also be done with qDNAseq [23] using the input control if  
252 available. Any other source of CNV data can also be used when put in a standard igv format.  
253 This CNV adjustment alters the differential peaks called by DESeq2. In the case of the MSS  
254 vs. MSI comparison, many peaks at the 8q region of the chromosome are being called  
255 significantly differential (Figure 3a) but, following CNV correction, the number of  
256 differential peaks in this region significantly decreased (Figure 3b).

257  
258 Gene Set Enrichment analysis is performed on the ranked list of genes produced by CoBRA.  
259 Without CNV adjustment, GSEA can indicate greatest enrichment in gene sets solely related  
260 to amplification. As a result, it is challenging to assess the true epigenetic differences  
261 between the two colorectal cancer types. For instance, the gene set  
262 'NIKOLSKY\_BREAST\_CANCER\_8Q12\_Q22\_AMPLICON' includes genes up-regulated in non-  
263 metastatic breast cancer tumors with amplification in the 8q22 region. Without adjustment for  
264 copy number variation, this gene set is significantly enriched (Figure 3c). It is the 3th ranked  
265 gene, with a normalized enrichment score of -2.84 and an adjusted p-value less than 0.0001.  
266 With CNV adjustment, this gene set is far less enriched (Fig. 3c). It is the 468th ranked gene  
267 set and has a normalized enrichment score of -1.32 and an adjusted p-value of 1.

268  
269 After CNV correction, the Hallmarks GSEA analysis shows that the MSI cell line has  
270 enrichment in the following pathways: TNFA signaling via NFkB, TFG beta signaling, and  
271 Inflammatory response (Figure 3d). This is consistent with the literature[24-25] in reference  
272 to colon cancer with MSS tumors exhibiting more inflammatory signaling.

#### 273 Example 3: Unsupervised analysis of time series ATAC-seq data

274 In this example, we illustrate the efficacy of CoBRA's analysis of ATAC-seq experiments by  
275 following the chromatin accessibility profile of differentiating cells [26]. In this experiment  
276 researchers utilized a five-day time course (0hr, 3hr, 24hr, 96hr, and 120hr) to profile  
277 accessible chromatin of HL-60 promyelocytes differentiating into macrophages ([GSE79019](#)).

278 The CoBRA output includes a principal component analysis (PCA) plot (Figure 4a) that  
279 demonstrates the temporal differentiation of the macrophages; the early time point is on the  
280 left side while the late time point is on the right. Furthermore, the output includes a sample-  
281 feature heatmap utilizing k-means (k=3) clustering (Figure 4b) that further illustrates the  
282 dramatic differences in open chromatin profiles. The three clusters show clear differences in  
283 open chromatin between the early (cluster 1), intermediate (cluster 2), and late stage (cluster  
284 3) time points.

285  
286 CoBRA automatically performs a de novo motif analysis on each of the three clusters of  
287 accessible sites to identify motifs of potential transcriptional regulators enriched in  
288 differentially accessible chromatin elements. This analysis identified many transcription  
289 factor motifs enriched in each cluster (Figure 4c). Motifs for PU.1, RUNX and MYB were  
290 enriched in cluster 1, which exhibits a decrease in accessibility during myeloid  
291 differentiation. It is likely that a depletion of PU.1, RUNX and MYB occupancy occurs at  
292 these elements during cellular commitment. In addition, we observe the EGR and MAF  
293 motifs in clusters 3 suggesting a gain of EGR and MAF occurs at these elements during  
294 macrophage differentiation. The motif analysis for cluster 2 also identified chromatin element  
295 NFKB and NFE2 as being active during differentiation and depleted in the latter stages. All  
296 of these findings are consistent with the results from published papers [26].  
297

298 Finally, ChIP-seq and ATAC-seq data is often generated in parallel with RNA-seq on the  
299 same samples. An extension to CoBRA can take the differential expression gene list from  
300 RNA-seq analysis tools such as VIPER [27] and highlight differentially expressed genes that  
301 also exhibit differential chromatin accessibility. The volcano plot in Figure 4d is a  
302 visualization of the genes differentially expressed during macrophage differentiation and  
303 highlights those genes that also have nearby opening chromatin during differentiation. Genes  
304 near open chromatin during differentiation are more likely to be upregulated. This profile that  
305 combines chromatin accessibility with gene expression can provide insight to potentially  
306 identify major transcriptomic elements driving differentiation.

## 307 Discussion

308 The case studies that we have presented highlight typical use cases for CoBRA. The first  
309 example is accurate identification of differential peaks using appropriate normalization of  
310 ChIP-seq data. Some methods fail to normalize correctly in calling differential peaks when  
311 the FRiP score is impacted by perturbations. CoBRA reduces false positives and identifies  
312 more true differential peaks by correctly normalizing for sequencing depth.  
313

314 The second example demonstrates how CoBRA can be used to account for amplification due  
315 to copy number variation present in experimental samples. This is an important feature, as  
316 copy number variation can drive the greatest differences between some tumor samples and  
317 obscure other biological changes to the cistrome that occur as a result of treatment or other  
318 experimental conditions. After adjustment of CNV, differential peaks called by DESeq will  
319 not be affected by amplification between samples, allowing biologists to better understand  
320 whether differences are caused by changes in the genetic or epigenetic landscape.  
321

322 The third example illustrates how CoBRA can be applied to ATAC-seq experiments.  
323 Unsupervised analyses can identify changes in the chromatin accessibility over time with  
324 treatment, and clustering provides insight into similarities and differences between samples  
325 and the investigation of the transcription factor motif enrichment in each cluster.  
326

327 The application of CoBRA to these experiments demonstrate the broad capabilities of the  
 328 workflow in analyzing ChIP-seq or ATAC-seq experiments. While other workflows used to  
 329 analyze ChIP or ATAC experiments exist, they lack some of the features present in CoBRA  
 330 (table 1). Additionally, the highly modular Snakemake framework allows for rapid  
 331 integration of new approaches or replacement of existing tools. Modules can be added simply  
 332 by adding a new Snakemake “rule” and adding a flag in the config file (Supplementary  
 333 Figure 2a-c) to turn the analysis on. Further, CoBRA’s “rules” can be composed of tools  
 334 written in R, Python, or shell script. The framework allows for great flexibility because each  
 335 module can be evaluated in its own environment using different tools (e.g. Python 2.7 and  
 336 Python 3 based software).

337  
 338 The methods for installing, deploying, and using CoBRA along with a detailed tutorial are  
 339 provided in the documentation available online(<https://cfce-cobra.readthedocs.io/>). The  
 340 workflow was designed to work with Docker, which allows the user to automatically  
 341 download all required software dependencies, eliminating the possibility of conflicting  
 342 dependencies. This makes CoBRA easy for those with limited computational training to  
 343 install and run the workflow. Furthermore, the user does not need to prepare any reference  
 344 files, as CoBRA automatically downloads all needed reference files. As a result, CoBRA is  
 345 portable, reproducible and easy to deploy.

346  
 347

| Pipelines Features                           | CoBRA | Diffbind | HMCandiff | ChIPcomp | Deeptools | esATAC | OPENANNO |
|----------------------------------------------|-------|----------|-----------|----------|-----------|--------|----------|
| Sample-sample Correlations                   | ✓     |          | ✓         |          | ✓         | ✓      |          |
| Sample-feature Clustering                    | ✓     | ✓        |           |          | ✓         |        |          |
| PCA analysis                                 | ✓     | ✓        |           |          |           |        |          |
| Normalize based on Sequencing Depth          | ✓     | ✓        |           |          |           |        |          |
| CNV Correction for Differential Peak Calling | ✓     |          | ✓         |          |           |        |          |
| Motif Analysis                               | ✓     |          |           |          |           | ✓      |          |



|                                                     |   |   |  |   |   |   |   |
|-----------------------------------------------------|---|---|--|---|---|---|---|
| Pathway Analysis                                    | ✓ |   |  |   |   | ✓ |   |
| Package Easy Update                                 | ✓ | ✓ |  | ✓ |   | ✓ | ✓ |
| Easy Support New Species                            | ✓ |   |  |   |   |   |   |
| Docker Containerized                                | ✓ |   |  |   |   |   |   |
| Annotate Peak Regions with Public ChIP-seq database | ✓ |   |  |   |   |   | ✓ |
| Step-by-Step Tutorial with Multiple Case Studies    | ✓ | ✓ |  |   | ✓ | ✓ |   |

348

349

350

351

352

353

354

355

356

357

358

359

**Table 1.** A comparison of the features of CoBRA with other available pipelines.

In summary we have developed a new pipeline, CoBRA (Containerized Bioinformatics workflow for Reproducible ChIP/ATAC-seq Analysis), that is fast, efficient, portable, customizable and reproducible. The workflow builds upon the ongoing effort to make computational research reproducible using defined workflows running inside Docker containers. CoBRA allows users of varying levels of technical skill to quickly process and analyze new data from ChIP-seq and ATAC-seq experiments. It is the authors' hope that CoBRA can be a starting point for others to build upon and improve CoBRA as a tool and extend its ability to analyze the cistrome.

360

## Availability of data and software

361

The dataset(s) supporting the conclusions of this article are all publicly available in the NCBI

362

Sequence Read Archive as referenced in the text.

363

364

The software described in this article is publicly available online.

365

Project name: CoBRA.

366

Project home page: <https://bitbucket.org/cfce/cobra>, <https://cfce-cobra.readthedocs.io>

367

Archived version: publication.

368

Operating system(s): UNIX; MacOS.

369

Programming language: multiple.

370 Other requirements: Docker, wget, git, miniconda3.

371 License: GNU GPL.

372 Any restrictions to use by non-academics: N/A.

373

374

## 375 **CRedit author statement**

376 Xintao Qiu: Methodology, Software, validation, Writing - Original Draft

377 Avery S. Feit: Methodology, Software, validation, Writing - Original Draft

378 Ariel Feiglin: Methodology, Software, validation

379 Yingtian Xie: Validation, Data Curation

380 Nikolas Kesten: Validation

381 Len Taing: Software, Validation

382 Joseph Perkins: Software

383 Ningxuan Zhou: Validation, Investigation

384 Shengqing Gu: Validation, Investigation

385 Yihao Li: Validation, Investigation

386 Paloma Cejas: Validation, Investigation

387 Rinath Jeselsohn: Resources, Validation

388 Myles Brown: Conceptualization, Supervision, Funding

389 X. Shirley Liu: Supervision, Project Administration

390 Henry W. Long: Supervision, Funding, Conceptualization, Writing - Review & Editing

391

## 392 **Competing Interests**

393 The authors have declared that no competing interests exist.

## 394 **Acknowledgements**

395 H.W.L. and M.B. acknowledge funding from the National Institutes of Health (USA) grant

396 2PO1CA163227.

397

## 398 **Authors' ORCID IDs**

399 Xintao Qiu 0000-0002-8560-7017

400 Paloma Cejas 0000-0002-8417-4811

401 Rinath Jeselsohn 0000-0001-7996-7529

402 Myles Brown 0000-0002-8213-1658

403 X. Shirley Liu 0000-0001-8588-1182

404 Henry W. Long 0000-0001-6849-6629

405

406

407

## 408 **References**

409 1. Ross-Innes CS, Stark R, Teschendorff AE, Holmes KA, Ali HR, Dunning MJ, et al.

410 Differential oestrogen receptor binding is associated with clinical outcome in breast cancer.

- 411 Nature. 2012;481:389–93.
- 412 2. Ashoor H, Héroult A, Kamoun A, Radvanyi F, Bajic VB, Barillot E, et al. HMCAN: a  
413 method for detecting chromatin modifications in cancer samples using ChIP-seq data.  
414 Bioinformatics. 2013;29:2979–86.
- 415 3. Allhoff M, Seré K, Chauvistré H, Lin Q, Zenke M, Costa IG. Detecting differential peaks  
416 in ChIP-seq signals with ODIN. Bioinformatics. 2014;30:3467–75.
- 417 4. Shen L, Shao N-Y, Liu X, Maze I, Feng J, Nestler EJ. diffReps: detecting differential  
418 chromatin modification sites from ChIP-seq data with biological replicates. PLoS One.  
419 2013;8:e65598.
- 420 5. Shao Z, Zhang Y, Yuan G-C, Orkin SH, Waxman DJ. MANORM: a robust model for  
421 quantitative comparison of ChIP-Seq data sets. Genome Biol. 2012;13:R16.
- 422 6. Liang K, Keles S. Detecting differential binding of transcription factors with ChIP-seq.  
423 Bioinformatics. 2012;28:121–2.
- 424 7. Wei Z, Zhang W, Fang H, Li Y, Wang X. esATAC: an easy-to-use systematic pipeline for  
425 ATAC-seq data analysis. Bioinformatics. 2018;34:2664–5.
- 426 8. Chen S, Wang Y, Jiang R. OPENANNO: annotating genomic regions with chromatin  
427 accessibility. doi:10.1101/596627.
- 428 9. Zheng R, Wan C, Mei S, Qin Q, Wu Q, Sun H, et al. Cistrome Data Browser: expanded  
429 datasets and new tools for gene regulatory analysis. Nucleic Acids Res. 2019;47:D729–35.
- 430 10. Köster J, Rahmann S. Snakemake--a scalable bioinformatics workflow engine.  
431 Bioinformatics. 2012;28:2520–2.
- 432 11. Qin Q, Mei S, Wu Q, Sun H, Li L, Taing L, et al. ChiLin: a comprehensive ChIP-seq and  
433 DNase-seq quality control and analysis pipeline. BMC Bioinformatics. 2016;17:404.
- 434 12. Ramírez F, Ryan DP, Gruning B, Bhardwaj V, Kilpert F, Richter AS, et al. deepTools2: a  
435 next generation web server for deep-sequencing data analysis. Nucleic Acids Res.  
436 2016;44:W160–5.
- 437 13. Heinz S, Benner C, Spann N, Bertolino E, Lin YC, Laslo P, et al. Simple Combinations  
438 of Lineage-Determining Transcription Factors Prime cis-Regulatory Elements Required for  
439 Macrophage and B Cell Identities. Molecular Cell. 2010;38:576–89.  
440 doi:10.1016/j.molcel.2010.05.004.
- 441 14. Mei S, Qin Q, Wu Q, Sun H, Zheng R, Zang C, et al. Cistrome Data Browser: a data  
442 portal for ChIP-Seq and chromatin accessibility data in human and mouse. Nucleic Acids  
443 Res. 2017;45:D658–62.
- 444 15. Wu D-Y, Bittencourt D, Stallcup MR, Siegmund KD. Identifying differential  
445 transcription factor binding in ChIP-seq. Front Genet. 2015;6:169.
- 446 16. Tak YG, Hung Y, Yao L, Grimmer MR, Do A, Bhakta MS, et al. Effects on the  
447 transcriptome upon deletion of a distal element cannot be predicted by the size of the  
448 H3K27Ac peak in human cells. Nucleic Acids Res. 2016;44:4123–33.
- 449 17. Piunti A, Hashizume R, Morgan MA, Bartom ET, Horbinski CM, Marshall SA, et al.

- 450 Therapeutic targeting of polycomb and BET bromodomain proteins in diffuse intrinsic  
451 pontine gliomas. *Nat Med.* 2017;23:493–500.
- 452 18. Maurano MT, Wang H, John S, Shafer A, Canfield T, Lee K, et al. Role of DNA  
453 Methylation in Modulating Transcription Factor Occupancy. *Cell Rep.* 2015;12:1184–95.
- 454 19. McClelland ML, Mesh K, Lorenzana E, Chopra VS, Segal E, Watanabe C, et al. CCAT1  
455 is an enhancer-templated RNA that predicts BET sensitivity in colorectal cancer. *J Clin*  
456 *Invest.* 2016;126:639–52.
- 457 20. Rahnamoun H, Lee J, Sun Z, Lu H, Ramsey KM, Komives EA, et al. RNAs interact with  
458 BRD4 to promote enhanced chromatin engagement and transcription activation. *Nat Struct*  
459 *Mol Biol.* 2018;25:687–97.
- 460 21. Taieb J, Le Malicot K, Shi Q, Penault-Llorca F, Bouché O, Tabernero J, et al. Prognostic  
461 Value of BRAF and KRAS Mutations in MSI and MSS Stage III Colon Cancer. *J Natl*  
462 *Cancer Inst.* 2017;109. doi:10.1093/jnci/djw272.
- 463 22. Kuilman T, Velds A, Kemper K, Ranzani M, Bombardelli L, Hoogstraat M, et al.  
464 CopywriteR: DNA copy number detection from off-target sequence data. *Genome Biol.*  
465 2015;16:49.
- 466 23. Scheinin I, Sie D, Bengtsson H, van de Wiel MA, Olshen AB, van Thuijl HF, et al. DNA  
467 copy number analysis of fresh and formalin-fixed specimens by shallow whole-genome  
468 sequencing with identification and exclusion of problematic regions in the genome assembly.  
469 *Genome Res.* 2014;24:2022–32.
- 470 24. Jung B, Staudacher JJ, Beauchamp D. Transforming Growth Factor  $\beta$  Superfamily  
471 Signaling in Development of Colorectal Cancer. *Gastroenterology.* 2017;152:36–52.  
472 doi:10.1053/j.gastro.2016.10.015.
- 473 25. Koi M, Tseng-Rogenski SS, Carethers JM. Inflammation-associated microsatellite  
474 alterations: Mechanisms and significance in the prognosis of patients with colorectal cancer.  
475 *World J Gastrointest Oncol.* 2018;10:1–14.
- 476 26. Ramirez RN, El-Ali NC, Mager MA, Wyman D, Conesa A, Mortazavi A. Dynamic Gene  
477 Regulatory Networks of Human Myeloid Differentiation. *Cell Syst.* 2017;4:416–29.e3.
- 478 27. Cornwell M, Vangala M, Taing L, Herbert Z, Köster J, Li B, et al. VIPER: Visualization  
479 Pipeline for RNA-seq, a Snakemake workflow for efficient and complete RNA-seq analysis.  
480 *BMC Bioinformatics.* 2018;19:135.

481  
482  
483

## 484 **FIGURE LEGENDS**

485

486 **Figure 1.** Overview of CoBRA.

487 a) Biological motivation of CoBRA. Comparisons between ChIP and ATAC-seq peaks in  
488 well-designed experiments can provide insight into differences in protein occupancy,  
489 histone marks and chromatin accessibility.

490 b) Overview of the workflow performed by CoBRA. Read counts are quantified and  
491 normalized for sequencing depth and CNV for clustering and differential peak calling  
492 analysis. The result of differential peak calling is used downstream for motif  
493 enrichment, GSEA, CistromeDB toolkit, and BETA analysis.

494

495 **Figure 2.** Example of unsupervised and supervised analysis of differential GR binding  
496 in A549 cells.

497 a) Sample-Sample heatmap depicting clustering and correlation between A549 cells  
498 treated with varying concentrations of dexamethasone.

499 b) Visualization the differences in the GR binding between the 0.5 and 50nM samples,  
500 plotted using mean of the peak intensities versus  $\log_2(\text{fold change})$ . This illustrates the  
501 change in the inferred differential GR binding profile following normalization using  
502 scaling factor determined by total reads in peaks (top) and sequencing depth (bottom).

503 c) Deeptools heatmap illustrating differential peaks called by DESeq2 using default  
504 scaling factor by total reads in peaks (left) or using scaling factor determined by  
505 sequencing depth (right). A group of peaks at the bottom of the left figure exhibit similar  
506 binding intensity, however, they are considered downregulated in 50nM treatment in  
507 the default DESeq2 result.

508 d) Cistrome Toolkit result illustrating publicly available ChIP seq datasets ranked by  
509 binding profile similarity to gained GR binding sites with dexamethasone treatment.

510

511 **Figure 3.** Identification of differential sites correcting for copy number.

512 a) Copy number distribution for an MSS sample on Chromosome 8 (top). Distribution of  
513 differentially called peaks with (middle) and without (bottom) CNV adjustment  
514 between MSS and MSI cell lines.

515 b) Significant differential peaks in 8Q prior to CNV correction are highlighted. X axis is  
516 the  $\log_2$  fold change and y axis is  $-\log_{10}$  of the adjusted p-value. Left side is without CNV  
517 correction, and the right side is with CNV correction.

518 c) Enrichment plot for NIKOLSKY\_BREAST\_CANCER\_8Q12\_Q22\_AMPLICON gene set  
519 without (left side) and with (right side) CNV adjustment.

520 d) Enrichment of Hallmarks gene sets after CNV correction based on the differential  
521 peak ranking comparing MSS with MSI.

522

523 **Figure 4.** Analysis of ATAC-seq from HL-60 promyelocytes differentiating into  
524 macrophages with CoBRA.

525 a) PCA plot depicting how samples cluster along the first two principal axes.

526 b) Sample-Feature heatmap created by CoBRA which depicts sample clustering on the  
527 horizontal axis and chromatin accessibility clustering on the vertical axis. Cluster 1,2,  
528 and 3 represent sites open at early, middle and late differentiation stages respectively.

529 c) Motifs enriched in early, middle, and late stage differentiation identified by CoBRA.

530 d) Genes differentially expressed during macrophage differentiation (120hr over 0hr).  
531 Those genes that also have nearby differential chromatin changes during differentiation  
532 are highlighted.

533

534

535 **Supplementary Figure 1.**

536 a) PCA plot depicting similarity between dexamethasone treated samples.

537 b) Clustering result of the motif enrichment for sites up with 50nM treatment over  
538 0.5nM.

539

540 **Supplementary Figure 2.**

541 a) Example of parameter setup in config.yaml file.

542 b) Example of parameter setup in config.yaml file.

543 c) Example of sample path setup in config.yaml file.

544

545 **Supplementary Figure 3.** File structure of CoBRA input and output.

546

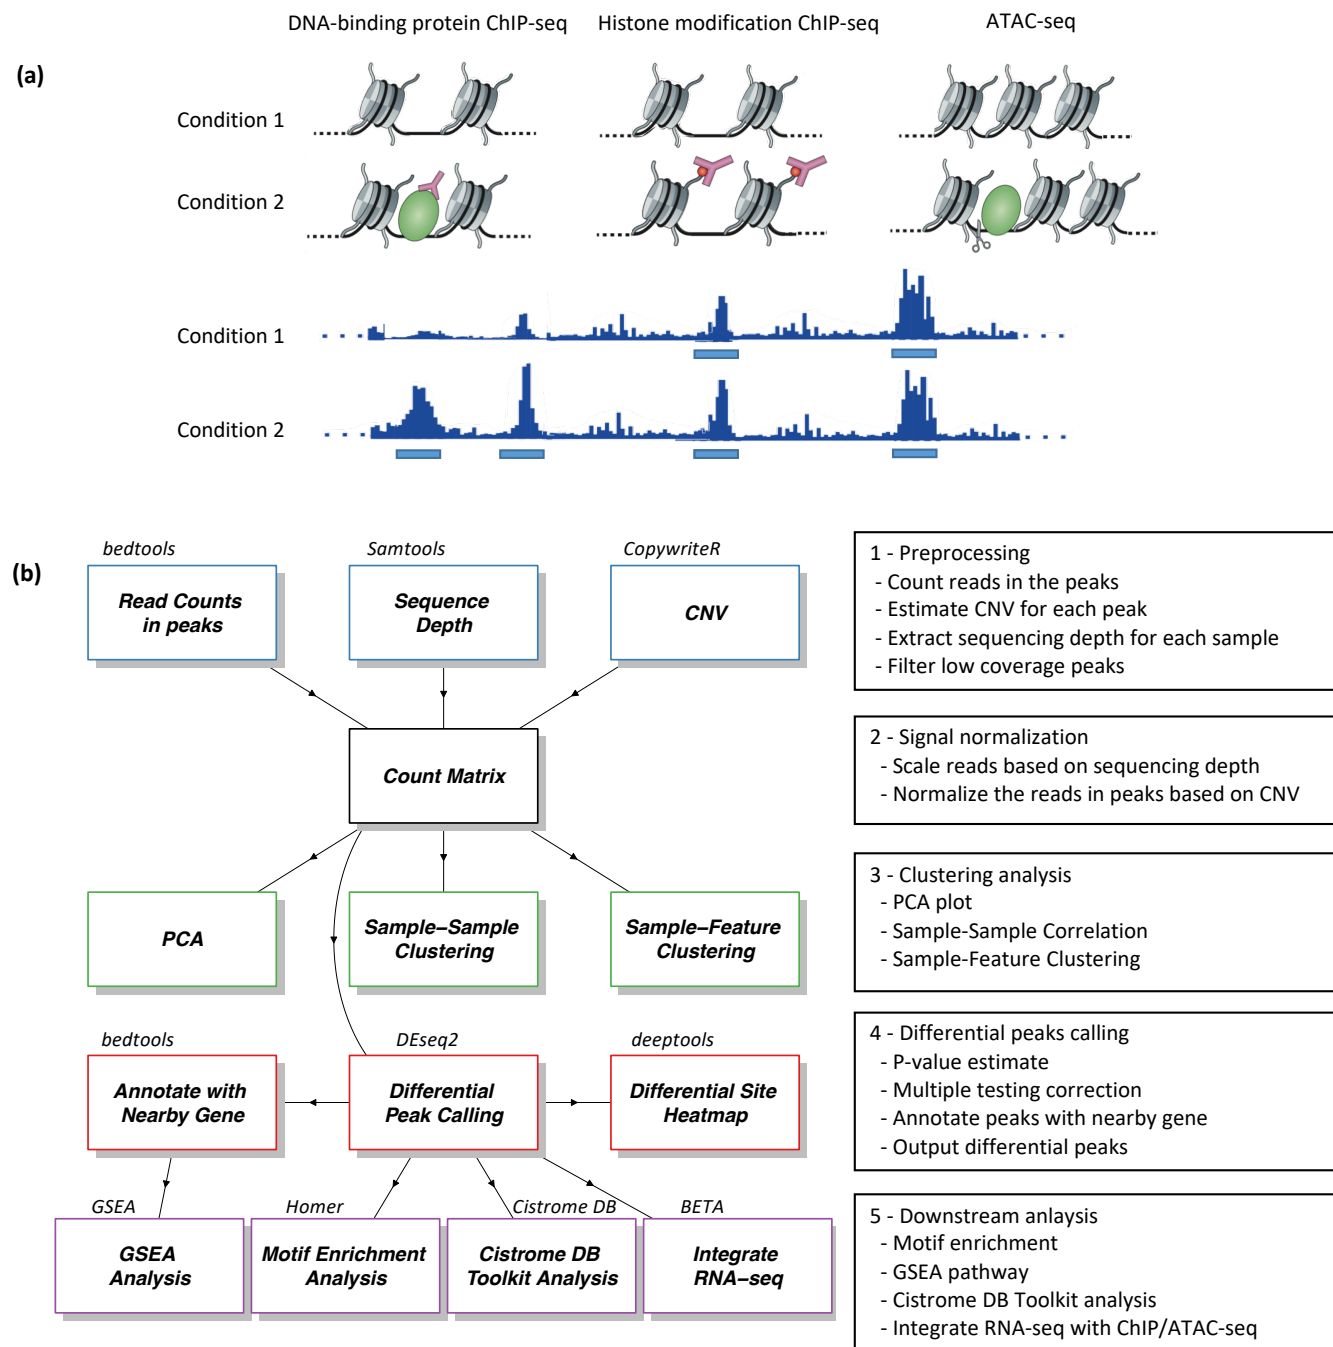

**Figure 1**

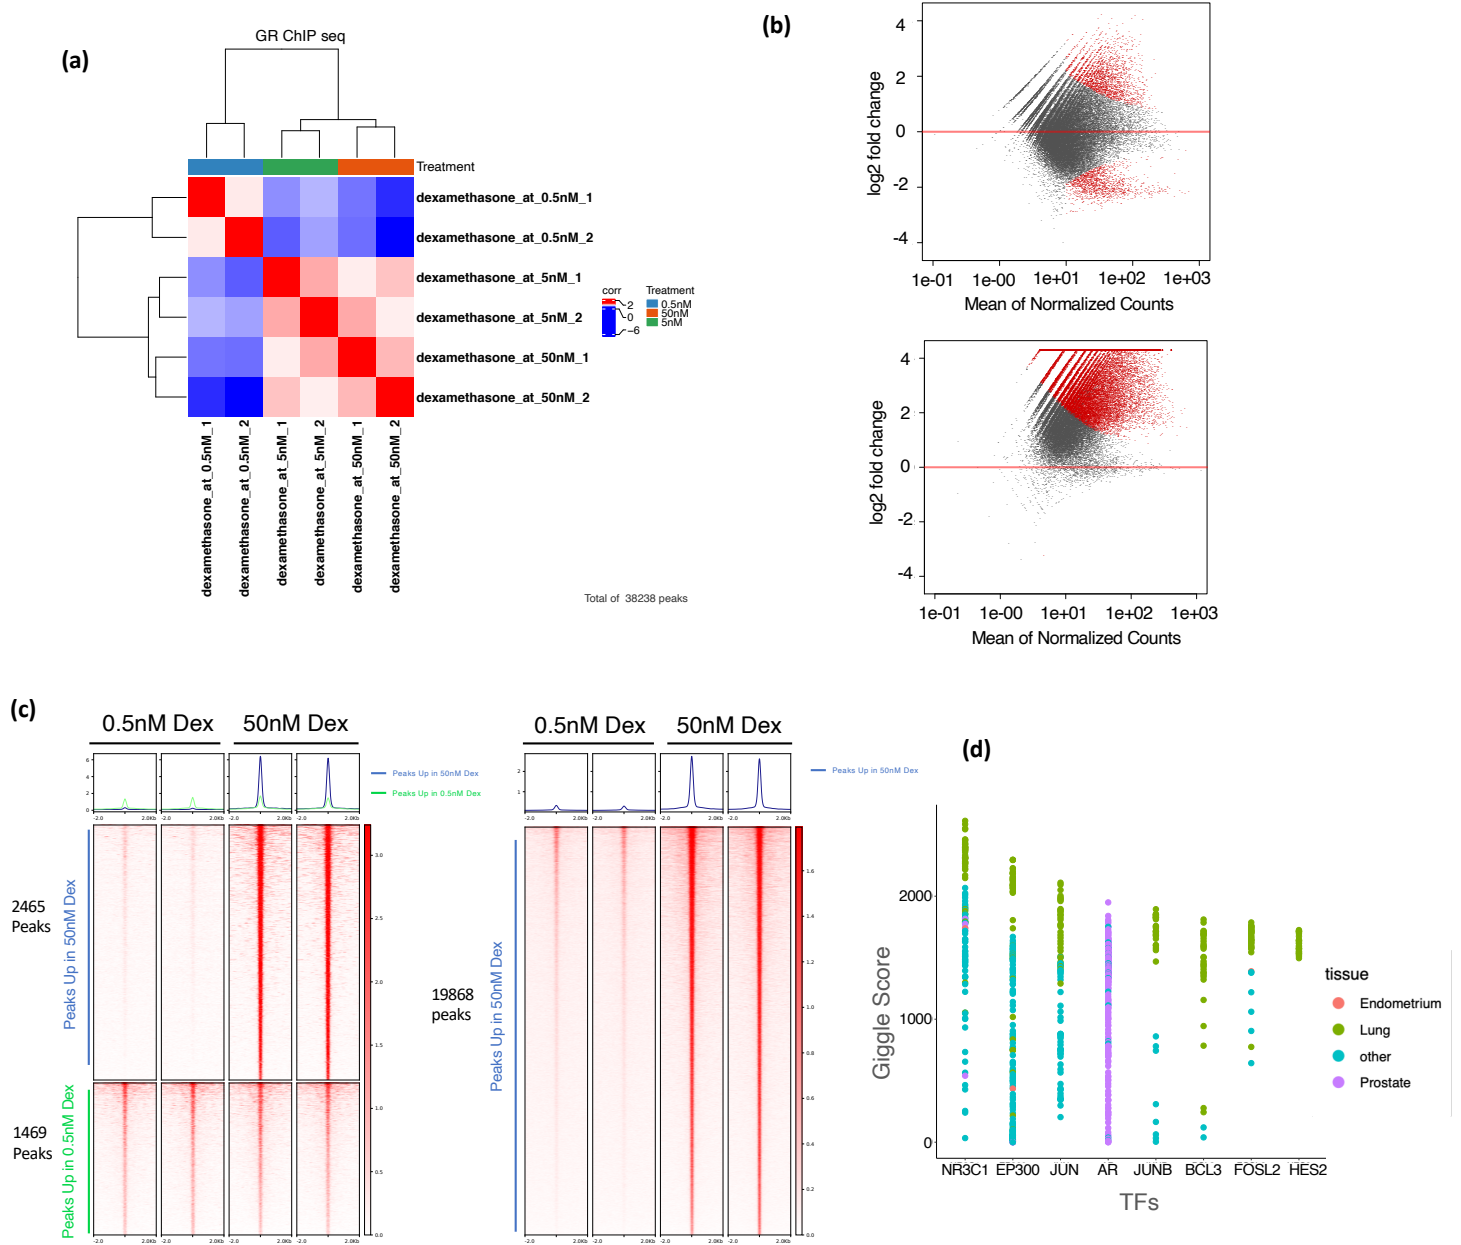

**Figure 2**



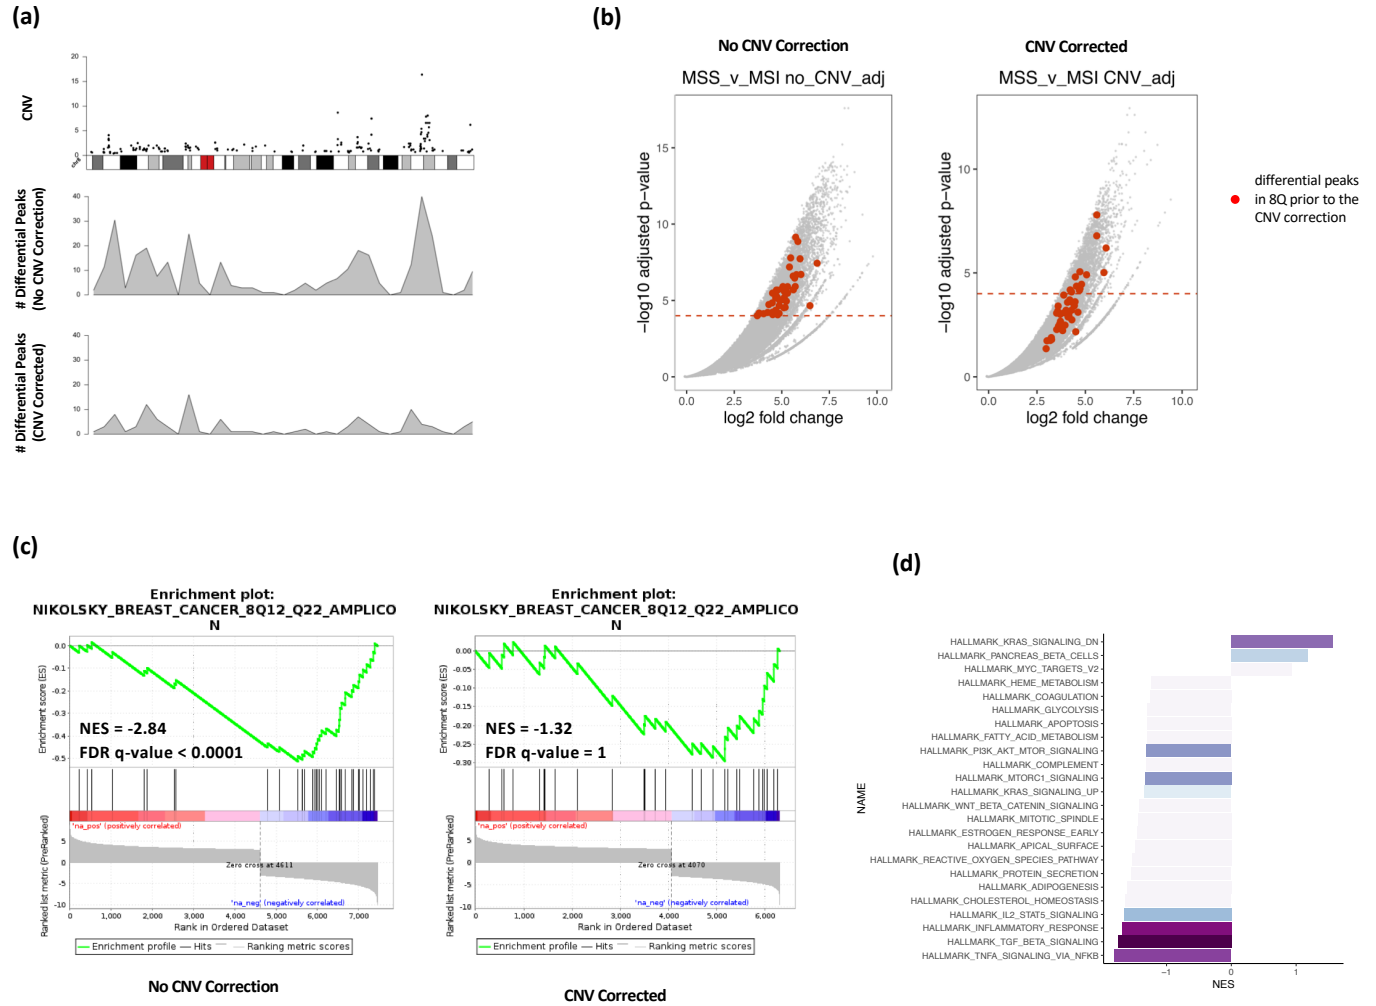

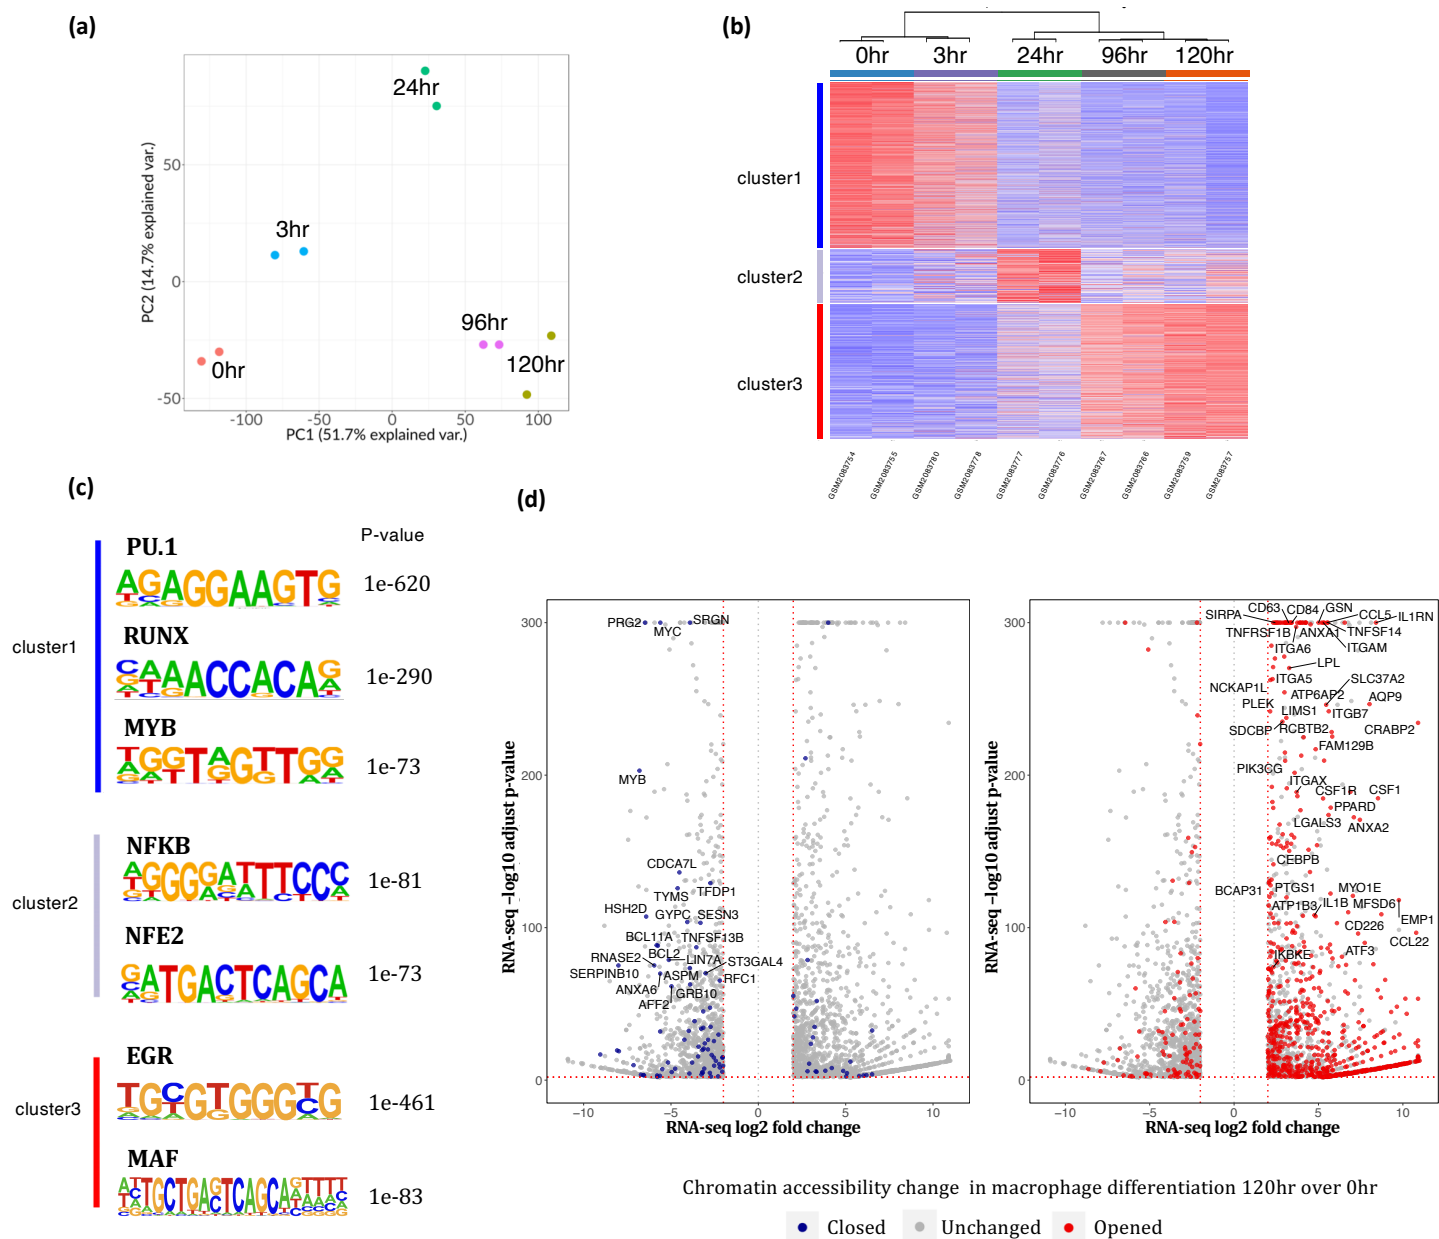

**Figure 4**

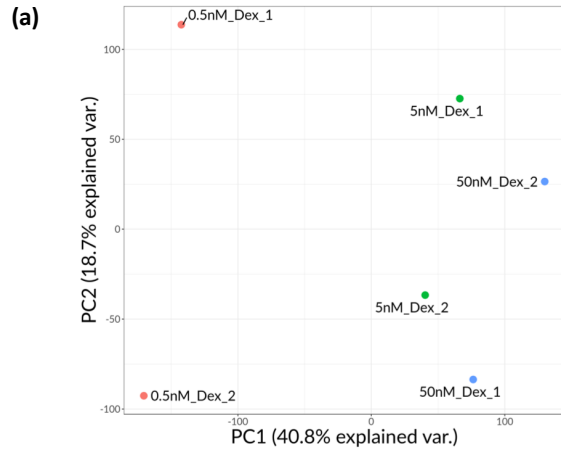

(b)

| Cluster | Motif | Name                                          | [Pfm]   | log(Pfm) # Target Sequences with Motif | % of Target Sequences with Motif | log(Pfm) # Background Sequences with Motif | % of Background Sequences with Motif |        |
|---------|-------|-----------------------------------------------|---------|----------------------------------------|----------------------------------|--------------------------------------------|--------------------------------------|--------|
| 1       |       | GRE/NR1B3/AR/SGL7-GRE-ChIP-Seq1/upsHshd/Homer | 1e-276  | 4477.45564                             | 3019.0                           | 44.276                                     | 1521.0                               | 3.616  |
|         |       | GRE/NR1B3/AR-GRE-ChIP-Seq2/MS/Homer           | 1e-2142 | 4932.29126                             | 2349.0                           | 34.446                                     | 824.5                                | 1.976  |
|         |       | AR/NR1L3/AR-AR-ChIP-Seq2/MS/Homer             | 1e-2031 | 4677.02589                             | 2676.0                           | 42.176                                     | 1742.3                               | 4.169  |
|         |       | PCB/NR1E2/PCB-PCB-ChIP-Seq2/MS/Homer          | 1e-1835 | 4225.92970                             | 2002.0                           | 38.159                                     | 1540.2                               | 3.676  |
|         |       | PR/NR1T4/PR-ChIP-Seq2/MS/Homer                | 1e-1225 | 3220.66895                             | 5622.0                           | 82.085                                     | 14086.6                              | 36.376 |
| 2       |       | FoxO1/FOXO1/FoxO1-ChIP-Seq2/MS/Homer          | 1e-1126 | 2590.86666                             | 2796.0                           | 41.036                                     | 3627.8                               | 8.656  |
|         |       | FoxO2/FOXO2/FoxO2-ChIP-Seq2/MS/Homer          | 1e-1092 | 2518.90325                             | 2396.0                           | 37.886                                     | 3139.8                               | 7.499  |
|         |       | Jarid2/JARID2/Jarid2-ChIP-Seq2/MS/Homer       | 1e-1048 | 2366.97626                             | 2728.0                           | 40.006                                     | 3729.9                               | 8.909  |
|         |       | AUF1/AUF1/AUF1-ChIP-Seq2/MS/Homer             | 1e-1037 | 2389.26826                             | 2973.0                           | 43.626                                     | 4536.5                               | 10.826 |
|         |       | RAT1/RAT1/RAT1-ChIP-Seq2/MS/Homer             | 1e-1027 | 2360.22869                             | 2020.0                           | 42.826                                     | 4396.5                               | 10.499 |
|         |       | FoxD1/FOXO1/FoxD1-ChIP-Seq2/MS/Homer          | 1e-1015 | 2338.54787                             | 2128.0                           | 31.206                                     | 2151.7                               | 5.319  |
|         |       | AP-1/AP1/AP1-ChIP-Seq2/MS/Homer               | 1e-950  | 2188.54174                             | 3045.0                           | 44.656                                     | 5166.9                               | 12.326 |
|         |       | Jarid1A/JARID1A/Jarid1A-ChIP-Seq2/MS/Homer    | 1e-918  | 2111.08968                             | 1762.0                           | 25.846                                     | 1544.5                               | 3.686  |
|         |       | Bach2/BACH2/Bach2-ChIP-Seq2/MS/Homer          | 1e-891  | 1105.61129                             | 1172.0                           | 17.186                                     | 1285.2                               | 3.076  |
|         |       | Bach1/BACH1/Bach1-ChIP-Seq2/MS/Homer          | 1e-791  | 446.28144                              | 962.0                            | 5.756                                      | 343.5                                | 0.826  |
|         |       | NF-EB2/NF-EB2/NF-EB2-ChIP-Seq2/MS/Homer       | 1e-188  | 455.58703                              | 427.0                            | 6.266                                      | 422.3                                | 1.016  |
|         |       | Nr2f1/NRF1/Nr2f1-ChIP-Seq2/MS/Homer           | 1e-168  | 387.84046                              | 362.0                            | 5.316                                      | 336.6                                | 0.806  |
|         |       | Nr2f3/NRF2/Nr2f3-ChIP-Seq2/MS/Homer           | 1e-141  | 322.91748                              | 322.0                            | 4.726                                      | 326.6                                | 0.796  |
|         |       | MafK/MYB/MafK-ChIP-Seq2/MS/Homer              | 1e-76   | 179.81922                              | 1473.0                           | 21.636                                     | 5620.6                               | 13.416 |

## Supplementary Figure 1

(a) From config.yaml input file into Cobra

```
#Project Name
#Use in pca, sample-sample, sample-feature plot. Please use "_" to separate different words
project: ChIP_seq

#enhancer option enhancer/promoter/all
enhancer: all

#Location of metasheet
metasheet: metasheet.csv
ref: "scripts/ref.yaml"

#Assembly is needed when separate enhancer/promoter, motif finding, nearby gene
assembly: hg19

#At least mini_num_sample should have RPKM > rpkm_threshold
rpkm_threshold: 1
mini_num_sample: 0

#Scale method for the normalize counts among samples
#z- z-score
#q- quantile-normalize
#l- log-transform
scale: q

#Filter metric in feature selection
#sd- Standard deviation
#cov- Coefficient of Variation
#av- mean
filter-opt: cov

#top percent cutoff
filter-percent: 100

#limited of peaks to use for plot
SSpeaks: 20000000
SFpeaks: 20000000

#number of k-means clustering in sample-feature plot
num_kmeans_clust: 6
```

**Supplementary Figure 2a**

(a) From config.yaml input file into Cobra

```
#correlation method for sample-sample, sample-feature plot
# "person" or "spearman"
cor_method: 'pearson'

#distance method for sample-sample, sample-feature plot
# "euclidean", "manhattan", "canberra", "binary", "maximum" or "minkowski"
dis_method: 'euclidean'

#DEseq_cut_off - Padj/LG2FC
Padj: 0.05
LG2FC: 0

#DEseq normalize method
#def - normalize by default setting of DEseq2
#depth - normalize by the sequence depth of each sample
nor_method: 'depth'

##Motif analysis - true/false
motif: 'false'

#BAM files sorted? true/false
bam_sort: 'true'

#CNV correction? true/false
CNV_correction: 'false'

#unchanged heatmap
unchanged_heatmap: 'false'

#fastq as input
fastq_in: 'true'

#number of threads used in bwa mem
thread: 8
```

**Supplementary Figure 2b**

**(a) From config.yaml input file into Cobra**

```
# sample names, e.g. "sample01" "sample02" can be any arbitrary string
# HOWEVER, these names must match what is in metasheet.csv
# FOR each sample, define the path to the fastq file

fastq:
  sample1:
    - ./XX1_R1.fastq.gz
  sample2:
    - ./XX2_R1.fastq.gz
  input:
    - ./XX_input_R1.fastq.gz

# bed, bam and bigwig is not needed when fastq_in is true
bed:
  sample1: ./XX1.bed
  sample2: ./XX2.bed

bam:
  sample1: ./XX1.bam
  sample2: ./XX2.bam

bigwig:
  sample1: ./XX1.bw
  sample2: ./XX2.bw

# tab-separated cnv files
cnv:
  sample1: ./XX1.igv
  sample2: ./XX2.igv
```

**Supplementary Figure 2c**

## Overview of Cobra Layout

(a)

|               |                                    |
|---------------|------------------------------------|
| metasheet.csv | Comma Separated Spreadsheet (.csv) |
| config.yaml   | YAML                               |
| Snakefile     | File                               |
| README.md     | Markdown File                      |
| scripts       | Directory                          |
| ref_files     | Directory                          |
| analysis      | Directory                          |

(b)

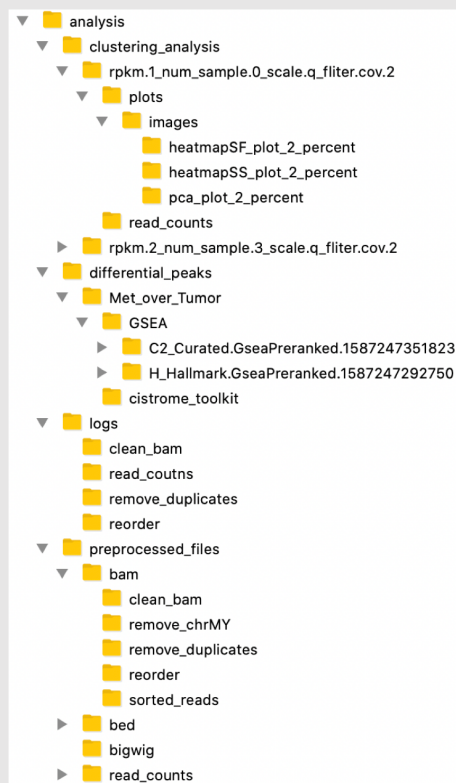

Supplementary Figure 3
